# Supplementary material for: High-fat diet feeding significantly attenuates anagliptin-induced regeneration of islets of Langerhans in streptozotocin-induced diabetic mice
Source: PubMed Central journal article supplement (PMC4475295; doi:10.1186/s13098-015-0047-y), 2015-06-02

Supplemental Figure

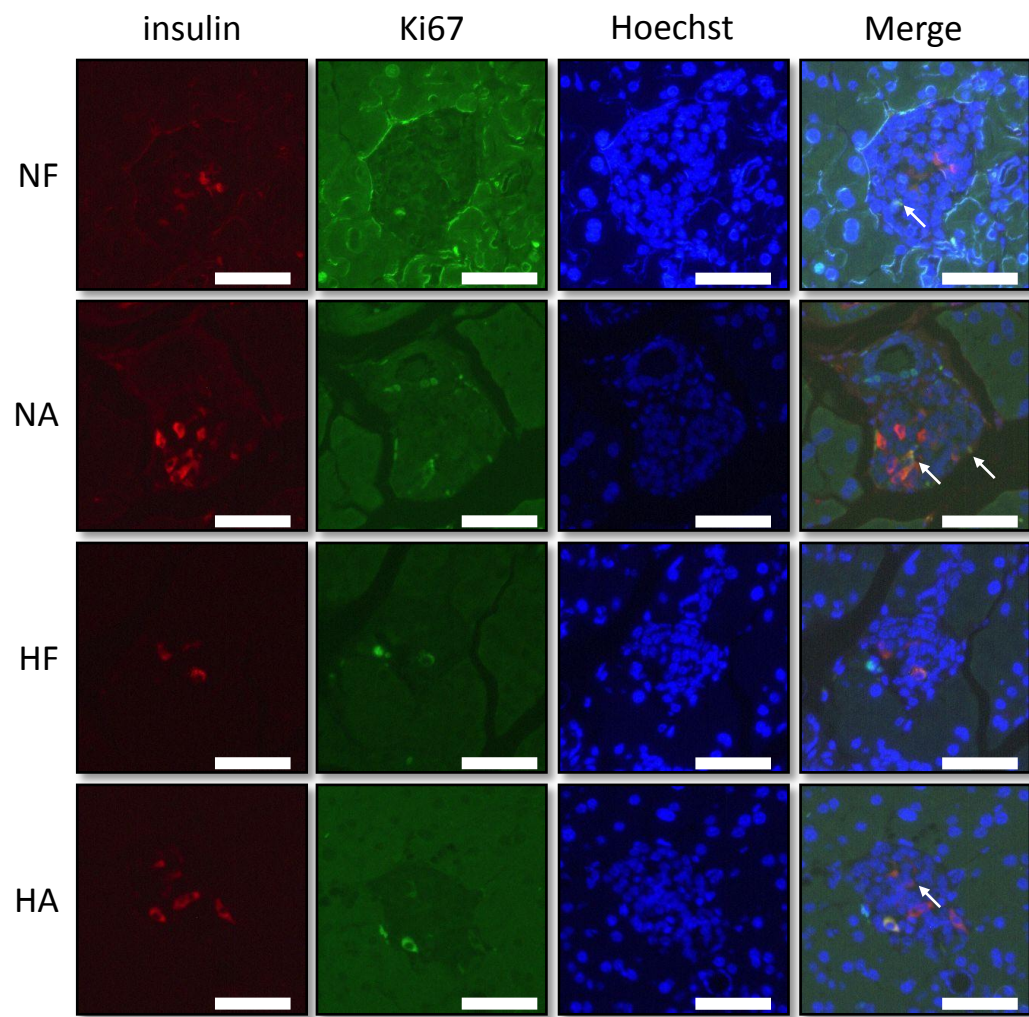

Supplement: 13098_2015_47_MOESM1_ESM.pdf [file 13098_2015_47_MOESM1_ESM.pdf]
